# Supplementary material for: A facile template method to fabricate strongly coupled 1D sandwich-like C@Fe3O4@C/Ni coaxial microtubes with enhanced catalytic performance
Source: Royal Society of Chemistry journal article supplement (doi:10.1039/d0ce00879f), 2020-01-01
Supplement: d0ce00879f1.pdf [file d0ce00879f1.pdf]

## **A facile template method to fabricate strongly coupled 1D sandwich-like C@Fe<sub>3</sub>O<sub>4</sub>@C/Ni coaxial microtubes with enhanced catalytic performance**

Qian Niu<sup>a</sup>, Min Zhang<sup>\*a</sup>, Libin Liu<sup>b</sup>, Jing Zheng<sup>a</sup>, Qunling Fang<sup>c</sup>, Jingli Xu<sup>a</sup>

<sup>a</sup>College of Chemistry and Chemical Engineering, Shanghai University of Engineering Science, Shanghai 201620, China.

Email: zhangmin@sues.edu.cn

<sup>b</sup>School of Chemistry and Pharmaceutical Engineering, Qilu University of Technology (Shandong Academy of Sciences), Jinan 250353, China.

<sup>c</sup>School of Food and Biological Engineering, Key Laboratory of Metabolism and Regulation for Major Diseases of Anhui Higher Education Institutes, Hefei University of Technology, Hefei, 230009, PR China

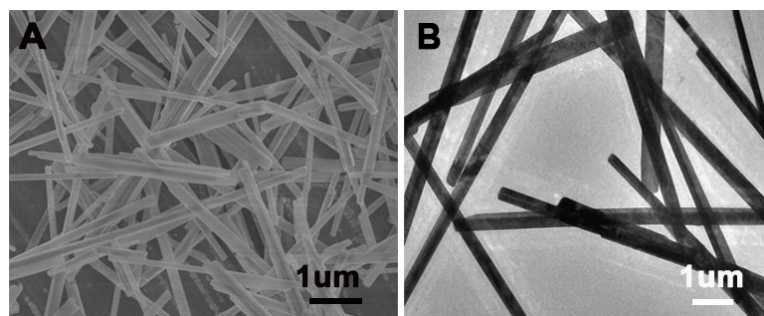

Fig.S1 SEM and TEM images of  $\text{MoO}_3$  (A, B).

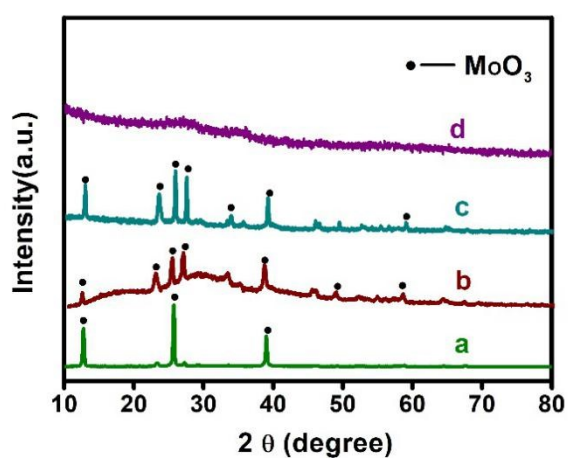

Fig.S2 XRD patterns of the as-prepared  $\text{MoO}_3$  (a),  $\text{MoO}_3$ @PPy (b),  $\text{MoO}_3$ @PPy@FeOOH (c) and PPy@FeOOH@RF- $\text{Ni}^{2+}$  (d).

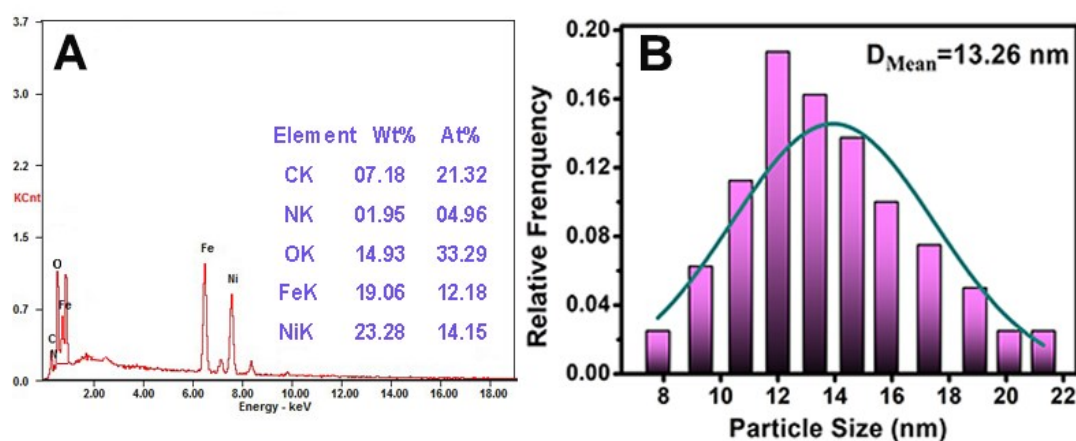

Fig.S3 (A) EDX spectrum of  $\text{C@Fe}_3\text{O}_4\text{@C/Ni-500}$  and the text inserted is the content of the element; (B) Size distribution of Ni nanoparticles distributed on coaxial microtubes.

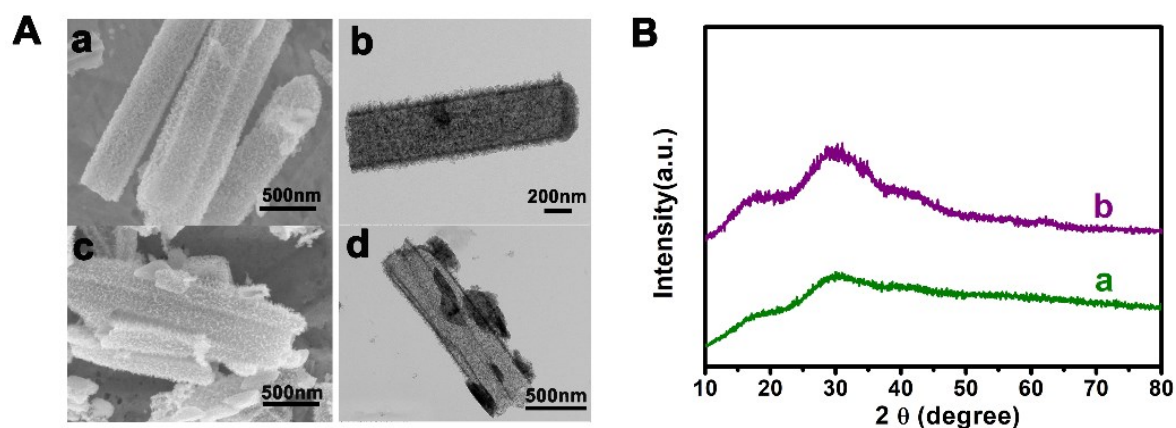

Fig.S4 (A) SEM and TEM images of PPy@FeOOH@RF (a, b) and C@Fe<sub>3</sub>O<sub>4</sub>@C (c, d); (B) XRD pattern of PPy@FeOOH@RF (a) and C@Fe<sub>3</sub>O<sub>4</sub>@C (b).

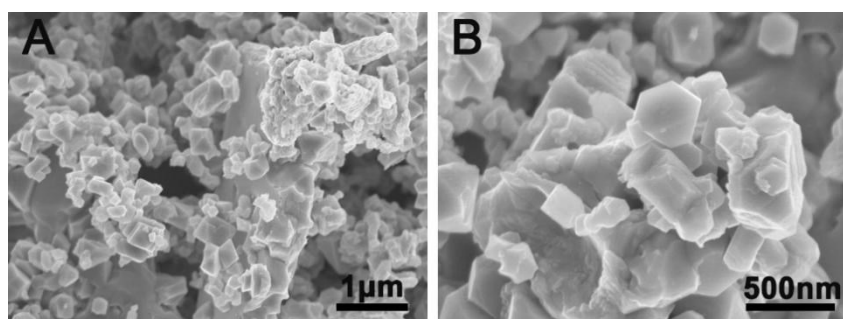

Fig.S5 SEM images of C@Fe<sub>3</sub>O<sub>4</sub>@C/Ni-900(A, B).

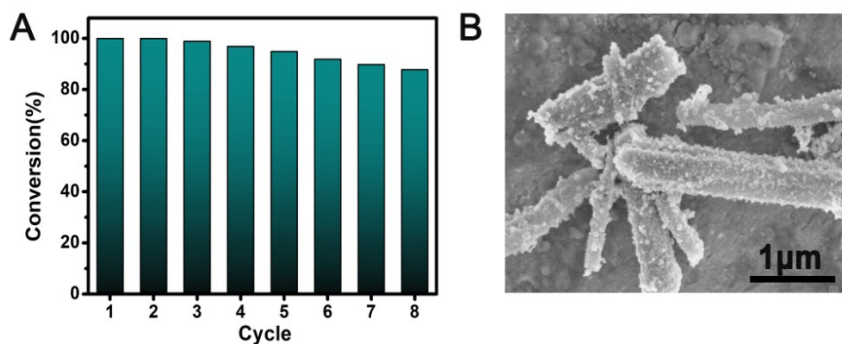

Fig.S6 Recyclability of the C@Fe<sub>3</sub>O<sub>4</sub>@C/Ni-500 as the catalyst (A); SEM image of C@Fe<sub>3</sub>O<sub>4</sub>@C/Ni-500 after cycle (B).

Table S1. ICP data of different samples and comparison for the reduction of 4-NP.

| Samples                                    | Ni content (μg/mg) | K (×10 <sup>-3</sup> s <sup>-1</sup> ) | □□□κ (mg <sup>-1</sup> s <sup>-1</sup> ) |
|--------------------------------------------|--------------------|----------------------------------------|------------------------------------------|
| C@Fe <sub>3</sub> O <sub>4</sub> @C/Ni-500 | 28.6               | 10.9                                   | 0.381                                    |
| C@Fe <sub>3</sub> O <sub>4</sub> @C/Ni-700 | 30.5               | 5.4                                    | 0.177                                    |
